# Supplementary material
Source: PubMed Central journal article supplement (PMC2708693)
Supplement: 0902204106_0902204106SI.pdf [file 0902204106_0902204106SI.pdf]

# Supporting Information

Olm et al. 10.1073/pnas.0902204106

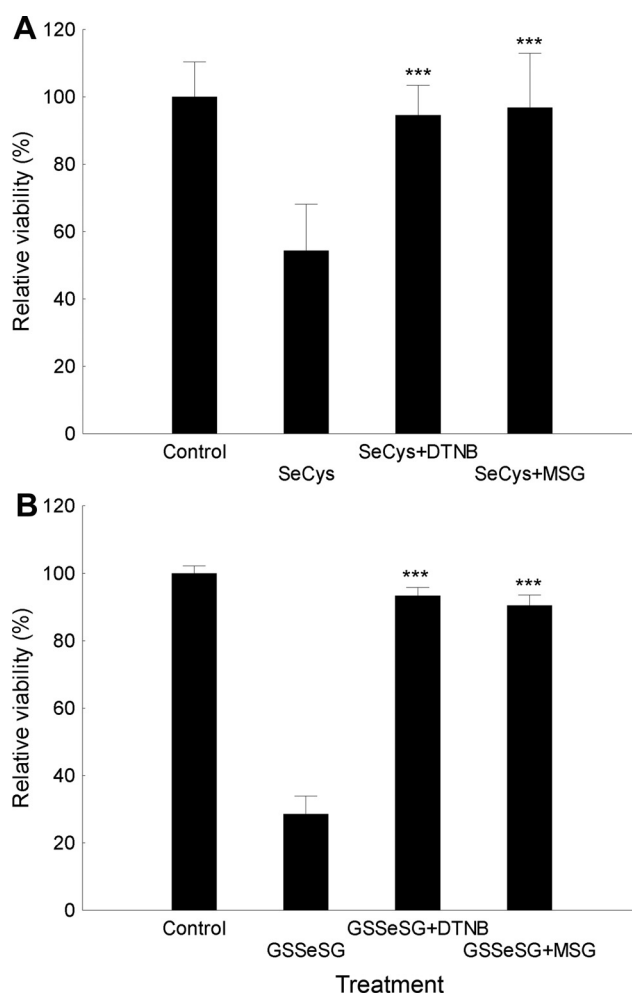

**Fig. S1.** Cytotoxicity of redox-active selenocompounds is inhibited by DTNB and MSG. (A) H157 cells treated with seleno-L-cystine (10  $\mu$ M) and in combination with DTNB (500  $\mu$ M) or MSG (60  $\mu$ M). (B) H157 cells treated with GSSeSG (3  $\mu$ M) and in combination with DTNB (500  $\mu$ M) or MSG (60  $\mu$ M). \*\*\* $P < .001$  in relation to treatment with selenocompounds.

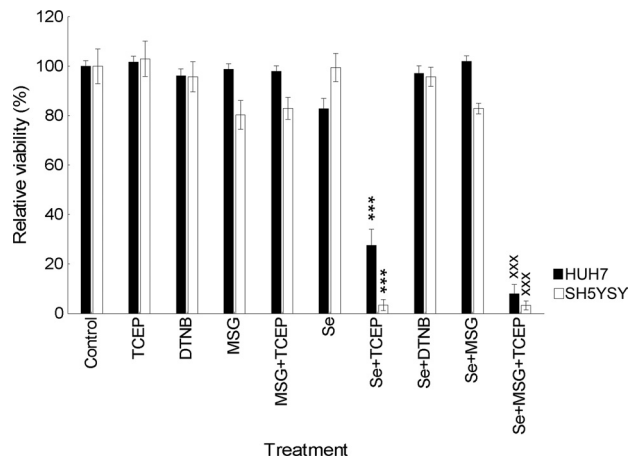

**Fig. S2.** Hepatoma and neuroblastoma cells display similar patterns in response to selenite compared with lung cancer cells when extracellular redox state or  $\chi_c^-$  cystine antiporter activity is modulated. Viability was measured by XTT in HUH7 hepatoma or SH5Y5Y neuroblastoma cells treated with 5  $\mu\text{M}$  selenite for 20 h. TCEP (75  $\mu\text{M}$ ) was used as an extracellular reductant, and DTNB (500  $\mu\text{M}$ ) was used as an extracellular thiol scavenger. MSG (60  $\mu\text{M}$ ) was used as an inhibitor of the  $\chi_c^-$  cystine/glutamate antiporter. TCEP (75  $\mu\text{M}$ ) with MSG was used as an extracellular thiol impact control. Error bars display  $\pm 0.95$  confidence intervals. \*\*\*(*xxx*) $P < .001$ , \*in relation to selenite, <sup>x</sup>in relation to selenite + MSG.

**Table S1. Selenite sensitivity and selenium uptake by human lung cancer cell**

| Cell line | Type                          | IC-50 selenite, $\mu\text{M}$ | Selenium uptake, ng/mg total protein |
|-----------|-------------------------------|-------------------------------|--------------------------------------|
| H157      | Non-small cell lung carcinoma | 4                             | $280 \pm 6$                          |
| U2020     | Small cell lung carcinoma     | 6                             | $60 \pm 9$                           |
| H611      | Non-small cell lung carcinoma | 22                            | NA (<10)                             |
